# Supplementary material for: Reduced vessel density in the superficial and deep plexuses in diabetic retinopathy is associated with structural changes in corresponding retinal layers
Source: PLoS One. 2019 Jul 18;14(7):e0219164. doi: 10.1371/journal.pone.0219164 (PMC6638849; doi:10.1371/journal.pone.0219164)
Supplement: S1 Table — (XLSX) [file pone.0219164.s001.xlsx]

## Sheet: demo
ID	gender	eye	age	VA	DR severity	previous PRP	HbA1c values (%)	DM duration		SSI	QI	SVP	DVC	ICP	DCP	FAZ Area	FAZ perimeter	FAZ acircularity	FD-300	ILM-RPE	ILM-IPL	INL-OPL
TYPE 1 DIABETES PATIENTS
1	M	OD	46	0	PDR	yes	6.7	35		78	8	48.68	45.35	42.64	29.8	0.378	2.646	1.21	49.96	345.8	120.1	66.7
2	M	OD	40	0.3	severe NPDR	no	7.1	15		65	7	46.55	42.96	38.7	24.58	0.402	2.626	1.17	50.84	356.3	119	84.8
3	M	OS	29	0	severe NPDR	yes	10	21		79	9	36.11	49.07	43.32	29.77	0.217	1.799	1.09	40.25	351.3	114.6	87.8
4	F	OS	27	0.1	severe NPDR	yes	12	21		77	8	42.54	43.83	40.46	25.46	0.217	1.866	1.13	43.13	298.7	106.8	72.9
5	F	OS	39	0	severe NPDR	yes	7.5	12		75	9	41.45	49.38	44.68	27.24	0.134	1.424	1.1	42.35	355	125.6	83.9
6	M	OS	44	0	PDR	no	8.6	32		75	8	45.59	48.65	45.75	30.31	0.44	2.92	1.25	50.05	312.7	103.1	59.8
7	M	OS	23	0.2	PDR	yes	8.8	16		74	8	35.25	38.56	35.12	21	0.842	4.718	1.45	45.12	310.6	96.3	83.5
8	F	OS	44	0.15	severe NPDR	yes	7.2	28		67	7	34.24	35.19	29.71	22.06	0.364	2.569	1.2	38.37	296.3	92.3	69.4
9	F	OS	27	0.1	PDR	yes	6.5	18		83	9	48.14	44.5	46	25.13	0.476	3.045	1.24	51.07	342.2	119.8	68.5
10	M	OD	44	0	severe NPDR	no	8.8	18		72	8	47.2	43	39.23	24.02	0.207	1.956	1.21	46.93	339.5	121.5	78.2
11	F	OS	36	0	severe NPDR	yes	11.1	28		76	8	45.07	47.91	45.8	30.49	0.434	2.86	1.23	44.16	313.8	113.6	67.4
12	F	OS	35	0	PDR	no	10.8	11		80	8	45.14	44.72	41.76	26.51	0.444	2.687	1.14	48.73	315.4	104.5	69.1
13	M	OD	39	0	severe NPDR	no	8.8	21		80	8	45.33	50.65	47.14	32.07	0.209	1.943	1.2	43.37	336.9	118	70.5
14	F	OD	38	0.1	severe NPDR	yes	6.5	24		80	8	45.44	47.63	42.89	31.79	0.326	2.377	1.17	49.19	312.9	109.1	63.5
15	M	OD	37	0.1	PDR	yes	7.5	18		78	9	39.03	49.39	46.19	34.08	0.608	4.693	1.7	48.77	333.7	97.2	74.7
16	M	OD	35	0.05	PDR	no	7.8	27		74	8	40.1	45.6	42.62	31.1	0.407	3.011	1.33	49.37	346.3	109.4	76.7
17	M	OD	34	0	PDR	yes	8.9	19		87	9	42.29	44.57	43.66	27.83	0.555	3.478	1.32	46.71	315.6	101.3	64.4
HEALTHY SUBJECTS
1	F	OS	36	0						87.96	9	48.93	59.27	52.19	39.76	0.314	2.273	1.14	52.59	332.8	108.1	67.6
2	M	OD	25	0						80.5	9	50.96	51.6	45.31	32.17	0.209	1.768	1.09	53.5	348.3	125.2	73.6
3	F	OS	34	0						77.68	9	52.62	53.14	49.23	34.1	0.26	1.958	1.08	58.68	335.9	122.1	81.2
4	M	OD	30	0						81.69	9	52.16	53.52	46.16	31.33	0.226	1.831	1.09	51.77	336.1	118.2	66.5
5	F	OD	28	0						77.48	8	49.21	58.11	47.84	38.39	0.172	1.814	1.23	54.06	322.5	112.7	69.1
6	F	OS	44	0						79.82	8	47.99	52.92	41.51	27.43	0.216	1.846	1.12	48.94	321	111.8	63.3
7	M	OD	40	0						80.7	9	53.04	55.22	47.94	34.52	0.194	1.754	1.12	54.65	355.8	133.4	74.8
8	M	OS	38	0						72.5	8	48.36	52.73	43.85	30	0.415	2.596	1.14	54.8	340	117	70.5
9	M	OD	28	0						75.63	8	50.64	57	50.21	35.53	0.138	1.5	1.14	52.17	340.3	116.2	72.7
10	M	OD	36	0						84.1	9	53.85	57.86	49.6	39.04	0.128	1.445	1.14	50.8	348.4	124.9	70.9
11	M	OS	38	0						73.21	9	48.84	54.22	45.57	32.53	0.256	2.017	1.13	49.75	329.9	116.9	66.9
12	F	OD	40	0						85.95	8	52.9	55.64	51.24	36.48	0.324	2.277	1.13	49.56	326.9	114.4	73.5
13	M	OS	41	0						74.22	8	46.04	54.05	42.45	29.1	0.159	1.809	1.28	51.13	320.1	115.6	67.3
14	F	OS	40	0						75.98	9	48.82	56.87	45.58	33.28	0.232	1.906	1.12	51.17	331	112.4	67.7
15	M	OD	54	0						79.84	9	50.26	53.94	49.98	33.89	0.22	1.833	1.1	49.14	344.3	116.1	70.4
16	F	OD	28	0						80.6	8	49.81	51.57	46.79	31.02	0.262	2.128	1.17	51.37	336.6	118.1	69.1
17	M	OD	32	0						81.31	8	57.22	52.13	48.94	35.8	0.17	1.62	1.11	53.64	355.5	129.6	68.6
